# Supplementary material
Source: Springer Nature journal article supplement (https://www.springermedizin.de/resource/supplementary/13063_2013_1430_MOESM1_ESM.pdf/9620014)

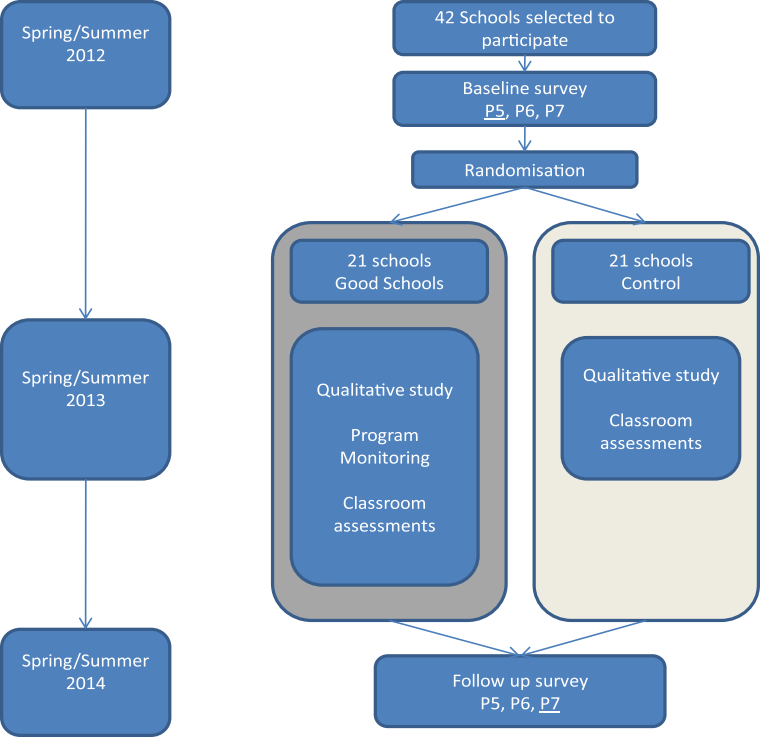

Supplement: MOESM1 [file 9620014]
